Urol Int , DOI: 10.1159/000547785

Received: May 5, 2025

Accepted: July 27, 2025

Published online: August 4, 2025

## **The Posterior Fornix Syndrome is an important differential diagnosis for interstitial cystitis/bladder pain syndrome**

Petros PE, Wenk MJ, Liedl B, Goeschen K, Bornstein J

ISSN: 0042-1138 (Print), eISSN: 1423-0399 (Online)

<https://www.karger.com/UIN>

Urologia Internationalis

### **Disclaimer:**

Accepted, unedited article not yet assigned to an issue. The statements, opinions and data contained in this publication are solely those of the individual authors and contributors and not of the publisher and the editor(s). The publisher and the editor(s) disclaim responsibility for any injury to persons or property resulting from any ideas, methods, instructions or products referred to the content.

### **Copyright:**

© 2025 S. Karger AG, Basel

## TITLE PAGE

**The Posterior Fornix Syndrome is an important differential diagnosis for interstitial cystitis/bladder pain syndrome.**

<sup>1</sup>Peter Emanuel Petros\* DSc DS (UWA) PhD (Uppsala) MB BS MD (Syd) FRCOG (Lond)

Tel: 61 2 9361 3853 Cellphone: (AUST) 61 411 181 731

Retired pelvic surgeon

Email [pp@kvinno.com](mailto:pp@kvinno.com) ORCID 0000-0002-9611-3258

Website [www.integraltheory.org](http://www.integraltheory.org)

\*Corresponding author

<sup>2</sup>Maren Juliane Wenk, Priv.-Doz. Dr. med. F.E.B.U.

Universitätsmedizin Mannheim, Universität Heidelberg

Klinik für Urologie und Urochirurgie

Theodor-Kutzer-Ufer 1-3

D-68167 Mannheim

E-Mail: [maren.wenk@umm.de](mailto:maren.wenk@umm.de) ORCID 0000-0001-8816-0786

<sup>3</sup>Bernhard Liedl MD.

Centre for Reconstructive Urogenital Surgery, Urology Clinic Munich, Planegg, Germany

Email: [bernhard.liedl@t-online.de](mailto:bernhard.liedl@t-online.de) ORCID 0000-0002-2646-823X

<sup>4</sup>Klaus Goeschen MD PhD

Medical School of Hannover, Hannover, Germany

Email: [klaus.goeschen@googlemail.com](mailto:klaus.goeschen@googlemail.com) ORCID 0000-0002-1861-1630

<sup>5</sup>Jacob Bornstein MD PhD

Azrieli Faculty of Medicine of Bar-Ilan University, Ramat Gan, Israel

Email: [mdjacob@gmail.com](mailto:mdjacob@gmail.com) ORCID 0000-0003-1932-527

**Key words** IC/BPS; Interstitial Cystitis/Bladder Pain Syndrome; posterior fornix syndrome; chronic pelvic pain; urgency; uterosacral ligaments.

**The Posterior Fornix Syndrome is an important differential diagnosis for interstitial cystitis/bladder pain syndrome.**

**Running title.** Posterior Fornix Syndrome and interstitial cystitis

**WORD COUNT** Text 3165. Abstract 226.

**Graphical Abstract** FIGURE HERE

## ABSTRACT

### Background

The Catalyst for this analysis was a statement by Dr Magnus Fall at a meeting of invited experts in 2020 of IC/BPS (Interstitial cystitis/bladder pain syndrome), "A paradigm shift in the understanding of IC/BPS is urgent". This review analyses such a paradigm shift.

### Summary

The paradigm shift began with the serendipitous cure of Hunner's Lesion in a woman with a diagnosis of Posterior Fornix Syndrome\* (PFS) and uterine prolapse. Retrospective analysis of surgical data from eight PFS studies reporting pain and urge cure found PFS was consistent with IC/BPS (Interstitial cystitis/bladder pain syndrome) definitions. No Hunner's lesions/ulcers were reported in the eight studies. Anatomical pathways for urge/frequency were consistent with Tanagho's descriptions of normal micturition (albeit, prematurely activated); pathways for abnormal emptying/retention were consistent with inability of pelvic muscles to open the posterior urethral wall prior to micturition; pathways for pelvic pain were consistent with de novo impulses from pelvic visceral plexuses caused by unsupported USLs (uterosacral ligaments).

\*Predictably co-occurring symptoms of chronic pelvic pain, urgency, frequency, nocturia, abnormal emptying, caused by USL laxity, are cured/improved by USL repair

### Key messages:

As PFS and IC/BPS have similar symptoms, USL repair of prolapse can potentially deliver improvement/cure for urge and pain symptoms, provided diagnostic PFS criteria (e.g., speculum test) for PFS are met. Two hypotheses explain inflammatory endorgan responses observed in Hunner's IC/BPS, and offer new research directions.

**Key words** IC/BPS; Interstitial Cystitis/Bladder Pain Syndrome; posterior fornix syndrome; chronic pelvic pain; urgency; uterosacral ligaments.

## 1. Introduction

The inspiration for this work was a statement by an eminent veteran expert in Interstitial Cystitis/Bladder Pain Syndrome (IC/BPS,) science, Dr Magnus Fall, *"A paradigm shift in the understanding of IC/BPS is urgent"* (1). The context was a debate within ESSIC (the IC/BPS society) about whether Hunner's lesion (HL) or ulcer (HU) were a separate disease entity from non-Hunner's IC/BPS (1). We interpreted his statement as a "cri de coeur" for a commonly acknowledged crisis summarized (frustratingly) by an erudite review on IC/BPS immunology as (2): *"Despite multiple clinical phenotypes and hypotheses for causation, and multiple failures of therapeutic trials, a validated aetiology for the disorder has yet to be identified."* The recent report of the ICI (International Consultation on Incontinence) confirms this dilemma (3): *"The aetiology of IC/BPS remains a wide-open field for investigation."* IC/BPS is defined as, *"A six-month duration of chronic pelvic pain, pressure, or discomfort perceived to be related to the urinary bladder accompanied by at least one other urinary symptom such as persistent urge to void or frequency. Confusable diseases as the cause of the symptoms must be excluded (3)".*

The new direction for the causation of IC/BPS, which we present, is the Posterior Fornix Syndrome (PFS), which has existed as a parallel universe since 1993 (4). PFS was part of the 2<sup>nd</sup> iteration of the Integral Theory of Female Urinary Incontinence (IT) (5), emphasising altered ligament collagen as a key causative factor in pelvic floor dysfunction. PFS is defined as *"predictably co-occurring chronic pelvic pain (CPP), urge, frequency, nocturia emptying difficulties/urinary retention, caused by uterosacral ligament (USL) laxity, and cured by USL repair"* (4,5). A strong connection between PFS and IC/BPS was only brought to light in 2021, by a serendipitous, histologically validated cure of Hunner's Lesion in a 73-year-old German woman treated strictly according to the diagnostic and surgical protocols for PFS by Dr Kay Scheffler, a double-trained gynaecologist/urologist (6).

**Importance of the Scheffler discovery** It overturned all previous concepts to do with IC/BPS as defined by the ICS (International Continence Society) and ESSIC (European Society for the Study of Interstitial Cystitis) (1-3): with IC/BPS having no known causation and cure. Quoting Karl Popper's statement on hypotheses and theories: one validated case can destroy all previous concepts\*.

\*\*The most quoted example of this principle was the discovery of black swans in Western Australia in 1697. In January 1697, Dutch explorer Willem de Vlamingh and his crew were the first Europeans to document the existence of black swans in what is now Western Australia. They observed these birds in abundance along the Swan River, which they subsequently named after the species. This discovery was significant because, prior to this, Europeans had only known of white swans, and the existence of black swans challenged their long-held assumptions about the species.

In his 1962 book "*The Structure of Scientific Revolutions*", American physicist and philosopher, Thomas Kuhn, characterised a paradigm shift as a revolution that challenges and ultimately takes the place of a prevailing scientific framework. Such challenges arise when the dominant paradigm, under which commonly accepted science operates, is found to be incompatible or insufficient for new data or findings, facilitating the adoption of a revised or completely new theory or paradigm (7).

The aim of this review is not to "challenge and ultimately take the place of a prevailing scientific framework". Instead, it aims to summarise the multiple scientific contributions by many researchers to the anatomical etiopathogeneses (5) behind the Posterior Fornix Syndrome (PFS) symptoms (chronic pelvic pain, urge, frequency, nocturia, abnormal emptying), and the reported surgical and non-surgical improvement or cure. The etiopathogenesis of these symptoms is key to our assertion, that if women diagnosed as non-Hunner's IC/BPS fit the diagnostic criteria of PFS, their condition can be considered similar to PFS. As such, it is potentially curable by USL repair.

We emphasise, and it is evident in the text of our paper, that we are not claiming that PFS is the cause of all non-H IC/ BPS. Rather the reverse, that PFS should be excluded in all women with non-H BPS.

We aim to show that in the female, the **PFS is one of the possible aetiologic** causes of organ pain, focusing on the urinary bladder. However, distal bowel dysfunction can also be caused by ligament weakness in the small pelvis, thereby extending the PFS symptom complex as summarized diagrammatically in the algorithm rectangle discussed later in this work. Though visceral pain mechanisms are applied to explain chronic pelvic pain (CPP) causation and cure by uterosacral ligament repair in this work, organ dysfunction might also be explained by disturbances in central nervous system functioning, such as sensitisation, cross-organ sensitisation, and viscerosomatic reactions caused by emotional stress responses. The pain and other symptom pathogeneses described in this work are limited to PFS-linked experimental data.

## 2. The different anatomical pathways of PFS

Though the component symptoms of PFS are considered to be primarily caused by uterosacral (USL) laxity (5), their very different anatomical pathways will be demonstrated later in this work. In brief, urge, frequency, and nocturia were consistent with a urodynamically validated prematurely activated micturition reflex (8) caused by anatomical defects in a binary feedback system (9). Chronic pelvic pain (CPP) follows a very different pathophysiologic pathway from the bladder (10), being a consequence of de novo impulses from unsupported visceral plexuses by USLs, as shown in Figure 1.

## 3. Serendipitous cure of Hunner's Lesion IC/BPS with PFS protocols

The link between PFS and IC/BPS emerged serendipitously in 2021 with a histologically validated surgical cure for IC/BPS Hunner's Lesion (6). A 73-year-old woman presented with urgency, half-hourly frequency and nocturia twice per night. She was treated strictly according to the protocols of the Posterior Fornix Syndrome (PFS). She had laxity of the cardinal and uterosacral ligaments (USLs) and pubocervical/rectovaginal fascia. Before undergoing surgery, she was tested with a "simulated operation" (11), mechanical support of the vaginal apex (and USLs) with a speculum (Figure 1) and a 3x6cm cylindrical pessary. Both led to almost complete relief of urgency and pain.

On cystoscopy under general anaesthesia, a bladder capacity of 300 mL, showed diffuse distension bleeding, chronic cystitis with patchy mucosal reddening, glomerulations, and a non-ulcerating Hunner's Lesion (6). Resection biopsies showed large numbers of mast cells within the muscular layer. Postoperatively, there was a good anatomical correction of the apical descensus. The patient reported that her symptoms were gradually disappearing, with voiding reduced to 5–6 times daily and nocturia once. A follow-up cystoscopy showed complete healing of the Hunner's Lesion, no bleeding, and no glomerulations. There was a substantial cure for the prolapse and PFS symptoms at the 3 years review.

Dr Scheffler raised the question, “As PFS symptoms are identical with those of interstitial cystitis (IC) as defined (1), are PFS and IC similar conditions? If so, then patients with IC who have a positive speculum test are, at least theoretically, potentially curable by USL repair. These questions need to be explored” (3).

#### 4. Surgical testing of the PFS and IC/BPS equivalence hypothesis

Goeschen et al. tested Scheffler’s hypothesis that IC/BPS and PFS were substantially equivalent conditions for truth or falsity (12). A retrospective study was performed with 198 women who presented with CPP (chronic pelvic pain), uterine/apical prolapse of varying degrees, and PFS symptoms. All 198 women had been treated by posterior USL sling repair. Goeschen et al. used the same PFS diagnostic protocols as Scheffler, a validated questionnaire, “simulated operations” (mechanically supporting USLs with a vaginal speculum test to test for relief of urge and pain (Figure 1) (11), urodynamics and, also transperineal ultrasound.

The 198 patients who had presented with chronic pelvic pain. (CPP), had 313 urinary symptoms, which conformed to the definition of IC/BPS (12). *However, there were no Hunner’s Lesions or ulcers found on cystoscopy.* The cure rate after USL sling repair was CPP: 74%; urge incontinence 80%; frequency 79.6%; abnormal emptying 53%; nocturia 79%; obstructive defecation 80%. Goeschen et al.’s findings supported the hypothesis that non-Hunner’s IC and PFS may be similar conditions. Retrospective examination of data from women who had undergone USL slings based on PFS protocols by Liedl et al. (13,14), Inoue et al. (15,16) Petros, Bornstein (17,18), Himmler et al. (19-21) gave similar cure rates for CPP and individual bladder symptoms to Goeschen et al. These studies collectively validated the USL cause-effect relationship hypothesised by Scheffler for PFS and non-H IC/BPS. There were no reports of Hunner’s ulcers or lesions during intraoperative cystoscopy in any of these studies.

#### 5. Chronic pelvic pain USL etiopathogenesis

The first PFS symptom which we analyse is chronic pelvic pain “of unknown origin” (CPP), Figure 1. CPP is by far the most disturbing PFS symptom. Its diagnosis and cure by uterosacral ligament (USL) plication was described for the first time in the English literature in 1996 by Petros (10). In a laparoscopically controlled study of 28 women who had native USL surgery (6 nulliparas), Petros found no abdominal cause for the CPP. The relief of pain when it occurred was immediate, 85% at 6 weeks and 70% at 12 months. A feature of the pain was wide variation in intensity, sufficiently severe for 6 of the women to be admitted into hospital as emergencies (10). A ring pessary inserted preoperatively improved the CPP in half of the women (10). Following USL native ligament plication (10), multiple sites of CPP were cured, which led to the hypothesis that the cause of the CPP was laxity in the visceral pelvic plexuses (VP), T11-L2 (10), which generated de novo afferent impulses to the brain, which were interpreted as pain from the end organs. See short video link for pathogenesis of CPP and urge.

<https://youtu.be/g3SXKzD4it8?si=DwTW2BTm58pOqzzz>

**FIGURE1 HERE**

#### 6. Association of PFS and vulvodynia

In 2003, Petros and Bornstein together prospectively assessed three women aged 45, 45 and 47 years, parity 3-4, with chronic pelvic pain, CPP, bladder symptoms, and also vulvodynia (18). All 3 had great difficulty having sexual intercourse and had undergone either Fenton’s operation or vaginal stretching. USL sling surgical repair of USLs was performed. All were cured or improved of both their bladder, pain and vulvodynia symptoms on postoperative review. These were the first cases in the literature which demonstrated the link between PFS vulvodynia and non H IC/BPS, which were cured by USL repair. It was these 3 cases which inspired the Bornstein local anesthetic test applied to the visceral plexuses.

#### 7. The Bornstein test for visceral plexus origins of CPP

The question arose about testing the hypothesis that CPP and vulvodynia were also caused by unsupported visceral plexuses (VPs). The hypothesis was tested by injection of local anaesthetic in the position of the uterosacral ligaments (2) in 11 patients (22). The pain was relieved for 20 minutes on both sides in 9 patients and on one side in two women.

*The Bornstein test for relief of pain in women with IC/BPS* Five ml of xylocaine 1% local anaesthetic solution were injected into the position of the uterosacral ligaments of 3 women with known painful bladder syndrome/interstitial cystitis. All had vascular glomerular changes in the bladder wall vessels observed during cystoscopy and bladder distension. Their symptoms included vulvodynia, low abdominal pain, dyspareunia, nocturia, urgency, and abnormal bladder emptying. The abdominal, urethral, introital and cervical tenderness and pain demonstrated objectively in all three patients immediately before the intervention, disappeared entirely or substantially improved within 5 minutes of the injection (23).

## 8. The binary model for normal bladder function

Bladder symptoms form the second limb of IC/BPS symptoms. The purpose of this section is to explain the anatomical pathways responsible for IC/BPS bladder function and dysfunction (9,24). Normal bladder function, (as shown in Figure 2), is cortically controlled and operates in only two states, EITHER closed (most of the time), OR open (when the bladder requires emptying) (9,24). Binary control functions like an electric switch, toggling between two reflexes: urethral closure or opening (micturition). In the original experiment, the handwashing test blocked the closure reflex (white arrows, Figure 2), allowing the micturition reflex to dominate (9).

### FIGURE2 HERE

*Control of urgency in the normal woman.* For urgency to be controlled in the normal woman, there must be sufficient tension in the vagina to support the urothelial stretch receptors “N” from below (visible in Figure 2). This tension is created by the opposite contractions of the pubococcygeus muscle (PCM) stretching the vagina forwards, the levator plate (LP) stretching the vagina backwards and conjoint longitudinal muscle of the anus (LMA) contracting downwards. This reflex action prevents “N” from firing off the afferent emptying impulses, which activate the micturition reflex to empty, felt as “an urge to go” by the patient (24).

*Urethral closure on effort in the normal woman* The same three directional forces close the urethra distally and at the bladder neck (as seen in Figure 2). *Distally:* PCM pulls the distal vagina forwards against the PUL to close the urethra from behind. *At the bladder neck:* LP stretches the proximal vagina and urethra backwards against the PUL to tighten them; LMA contracts down against the USL to rotate the now tensioned bladder base around the arc of Gilvernet to close the urethra at the bladder neck. See VIDEO of three directional muscles:

[https://youtu.be/GkK5V6LvC3w?si=sWj\\_6Pk9xpseoSnI](https://youtu.be/GkK5V6LvC3w?si=sWj_6Pk9xpseoSnI)

*Micturition in the normal woman* With reference to Figure 2, PCM relaxes; LP/LMA pulls down the anterior part of LP to open the posterior wall of the urethra (white broken lines). This external opening mechanism exponentially reduces resistance to urine flow from the contracting detrusor following Poiseuille’s Law, where flow is inversely proportional to the fourth power of the radius. The detrusor smooth muscles contract collectively in a coordinated manner, similar to a spasm, to empty. (See micturition video).

<https://youtu.be/nK0CQmaS-5E?si=fPZYZC6AL8sYpFcS>

## 9. Pathogenesis within the binary model

Any abnormality in the binary control circuit can affect the micturition reflex, leading to retention or OAB, as seen in Figure 2.

*Neurological lesions* such as stroke (cortex), spinal cord injury, and multiple sclerosis (MS) in the afferent circuit can cause retention. Similarly, MS in the efferent nerve circuits can affect peripheral control, resulting in urgency.

*Lax PUL and USL ligaments* weaken the three directional muscles that contract against them, diminishing all three muscle functions. Critically, these weakened functions often co-occur, manifesting as closure (stress urinary



incontinence, urine leakage), evacuation difficulties, retention, and the urge control mechanism (urge, frequency, nocturia).

*Local lesions* such as inflammation, urothelial cancer, and cervical fibroid pressure can stimulate “N” to increase afferent impulses, which the brain perceives as urgency. If these afferent impulses from “N” cannot be suppressed directly or by activation of the peripheral musculoelastic mechanism ( visible in Figure 2), the micturition reflex is activated, causing OAB and incontinence.

#### **10. Urge as a prematurely activated uncontrolled micturition**

A urodynamically controlled experiment demonstrated that what was then known as “detrusor instability” (now “DO”) is equivalent to a prematurely activated micturition (8). The pattern of urine loss was identical to that seen by Tanagho during normal micturition (25): (I) sensation of urge; (II) fall in proximal urethral pressure; (III) rise in detrusor pressure; (IV) urine loss. See also <https://doi.org/10.1002/nau.24990> *OAB (urge, frequency, nocturia)*. Weakness in either the PUL or USL impairs the muscles contracting against them, as seen in Figure 3. With reference to Figure 2, weakened PCM and LP/LMA muscles cannot adequately stretch the vagina to support “N”, leading to afferent emptying impulses reaching the cortex, interpreted as an ‘urge to go’ by the patient (24). Beyond a critical point, the micturition reflex temporarily overrides control. The system becomes unstable and swings between “open” and “closed”, which is the key characteristic of OAB and urodynamic “DO” (“detrusor overactivity”).

#### **11. Emptying, urinary retention**

Weak USLs reduce the contractile force of the LP and LMA muscles that contract against them, as seen in Figure 3. The weakened LP/LMA cannot open the urethra before micturition. Consequently, the detrusor contracts against a relatively unopened urethra against high urethral resistance, which the cortex correctly interprets as “obstruction”.

**FIGURE 3 HERE**

#### **12. The anatomical pathway of nocturia**

At night, the woman is in the supine position, so the muscle vectors cannot stretch the vagina to support the stretch receptors “N”, Figure 4. A loose USL cannot prevent the proximal vagina and bladder base from being pulled down by gravity “G” (Figure 4). The downward stretching simulates the stretch receptors “N” activating the micturition reflex, which the cortex interprets as “urge”. A pessary or tampon can often alleviate nocturia if it can sufficiently support the weakened USLs.

**FIGURE 4 HERE**

#### **13. Non-surgical treatment by squatting-based pelvic floor exercises.**

In a retrospective study, two separate groups comprising 138 women performed squatting-based exercises for stress urinary incontinence (SUI), OAB, pain, and emptying symptoms (26). All participants completed validated pelvic questionnaires (27), pad tests, and diaries.

Across both groups of mainly premenopausal women, 61% - to 80% of the women had greater than 50% improvement in symptoms of SUI, urge, frequency, nocturia, abnormal emptying, and post-void residual urine at a 3-month review; 37 of the 138 women from both studies fulfilled the ICS definition of Interstitial Cystitis (IC), chronic pelvic pain (CPP) and co-occurrence of one bladder symptom, which are identical or similar symptoms as those characterising PFS. The anatomic rationale for the cure was that the squatting-based exercises strengthen the three reflex muscles controlling bladder functions and the uterosacral ligaments against which these muscles contract (26).

Dr Skilling concluded that whether the conditions IC and PFS are identical or distinct, their component symptoms can, in the main, be improved by more than 50% by a squatting-based exercise regime.

#### 14. Validated questionnaire applied to known Interstitial Cystitis women

Sandy McNicol, the secretary of the Canadian Interstitial Cystitis Society, distributed the validated structured Integral Theory Questionnaire to members of the IC society.

Of 136 questionnaires completed in 2000, 130 had two or more parameters indicative of posterior ligamentous laxity (visible in rectangle Figure 5) (28). Urgency and pelvic pain are key symptoms in patients with posterior fornix syndrome.

**FIGURE 5 HERE**

#### 15. Hypothetical pathways of HL and HU IC/BPS

In his 1996 paper, based on endorgan pain sites relieved by USL plication: (lower abdomen, cervical excitation pain, deep dyspareunia, coccyx, introitus) Petros hypothesised that nerve impulses from unsupported visceral plexuses (VP) were causing the pain. One hypothesis to explain HL and HU is that once afferent signals from the visceral plexuses are registered as pain by the brain, efferent signals are sent via the visceral nerve system, eliciting an inflammatory response at the end organ, (visible in Figure 1). A second, more recent hypothesis proposes a similar mechanism but involves the axon reflex (29). According to this hypothesis, such conditions involve axon reflexes. Stimuli, such as gravity applied to unsupported nerve branches within the visceral pelvic plexus trigger centrally propagating impulses, which then progress antidromally. These impulses influence innervated tissues through cytokine release and nociceptor stimulation, perpetuating inflammatory processes at the end organs and pain perception.

Both hypotheses raise the question, "Are IC/BPS, vulvodynia, other pain sites, different phenotypes of the chronic pelvic pain syndrome"? If so, the hypothesis opens several new research directions and predicts inflammatory findings on histological examination of tender endorgan pain sites.

#### 16. Conclusions

The Posterior Fornix Syndrome (PFS) is a new direction for IC/BPS. High rates of cure have been reported in hundreds of women following USL repair in women with Posterior Fornix Syndrome (12-17). We emphasise, and it is evident in the text of our paper, that we are not claiming that PFS is the cause of all non-H IC/ BPS. Rather the reverse, that PFS should be excluded in all women with non-H BPS.

If women diagnosed as non Hunner's IC/BPS fit the diagnostic criteria of PFS, their condition can be considered similar to PFS. As such, it is potentially curable by USL repair. All of us have seen women who do not fit these criteria, and we do not operate on such women.

Obstacles to answering the question of whether PFS and ICS/BPS in women are one and the same condition are few. Speculum or vaginal probe tests can easily be performed as part of the initial IC/BPS examination. The Bornstein local anaesthetic test in the distal USLs can definitively confirm visceral plexus causation of the pain component.

Meanwhile, IC/BPS experts with gynaecological skills can perform USL plication in women with uterine prolapse and PFS symptoms using the transverse vaginal incision technique described preferably employing wide-bore collagenopoeitic No. 2 polyester sutures for longer term results (30). see VIDEO link for summary of etiopathogenesis and actual surgical technique <https://youtu.be/6LAqp9rfDDU?si=K9AUrrAscQy6Sh73>

**Conflict of interest statement** The authors have no conflicts of interest to declare.

**Funding Sources:** This study was not supported by any sponsor or funder.

**Author Contributions.** Content: MW, BL, KG, JB, PP. Conceptualization: MW, BL, PP. Writing: MW, BL, PP. Reviewing, checking manuscript, additions: BL, PP, KG, JB. Figures and videos: PP.

#### References



1. Fall M, Nordling J, Cervigni M, Oliveira PD, Fariello J, Hanno P, et al. Comments to Editorial by J. Curtis Nickel. It is premature to categorize Hunner lesion interstitial cystitis as a distinct disease entity. *Scand J Urol*. 2020;54(2): 99-100. <https://doi.org/10.1080/21681805.2020.1744714>. SJU [Internet]. 2020 Mar. 7 [cited 2024 Nov. 18];54(4):355-6.
2. Fallon J, Tabansky Stern I, Laurent M, Birder L, Moldwin RM, Stern JNH. The immune system in Interstitial Cystitis/Bladder Pain Syndrome and Joel N.H. therapeutic agents, *Continence*. 2023 Dec;6:101057. <https://doi.org/10.1016/j.cont.2023.101057>
3. Hanno P, Cervigni M, Choo MS, Clemens JQ, Lee MH, Malde S, Meijlink J, Samarinas M, Ueda T, Gold D. Summary of the 2023 report of the international consultation on incontinence interstitial cystitis/bladder pain syndrome (IC/BPS). *Continence*. 2023 Dec;8:101056.
4. Petros PE, Ulmsten U. The posterior fornix syndrome: a multiple symptom complex of pelvic pain and abnormal urinary symptoms deriving from laxity in the posterior fornix. *Scand J Urol Nephrol*. 1993;27 Suppl 153:89-93.
5. Petros PE, Ulmsten U. An Integral Theory and its method, for the diagnosis and management of female urinary incontinence. *Scand J Urol Nephrol*. 1993;27 Suppl 153:1-93.
6. Scheffler KU, Hakenberg OW, Petros PE. Cure of interstitial cystitis and non-ulcerating Hunner's Ulcer by cardinal/uterosacral ligament repair. *Urol Int*. 2021;105:920-923. [doi:10.1159/000515647](https://doi.org/10.1159/000515647).
7. Kuhn T. *The Structure of Scientific Revolutions*. University of Chicago Press 3<sup>rd</sup> Ed. 1970:191-210.
8. Petros PE, Ulmsten U. Bladder instability in women: A premature activation of the micturition reflex. *Neurourol Urodynam*. 1993;12:235-239. [doi:10.1002/nau.1930120305](https://doi.org/10.1002/nau.1930120305)
9. Petros PE. Detrusor instability and low compliance may represent different levels of disturbance in peripheral feedback control of the micturition reflex. *Neurourol Urodyn*. 1999;18:81-91. [doi:10.1002/\(sici\)1520-6777\(1999\)18:2<81::aid-nau3>3.0.co;2-z](https://doi.org/10.1002/(sici)1520-6777(1999)18:2<81::aid-nau3>3.0.co;2-z)
10. Petros PP. Severe chronic pelvic pain in women may be caused by ligamentous laxity in the posterior fornix of the vagina. *Aust N Z J Obstet Gynaecol*. 1996;36:351-4. [doi:10.1111/j.1479-828x.1996.tb02727.x](https://doi.org/10.1111/j.1479-828x.1996.tb02727.x)
11. Riccetto C, Gunnemann A, Abranches Monteiro L, Wu Q, Goeschen K, Liedl B. Simulated operations (SOs) apply mechanical support to structures to confirm symptom causation. *Ann Transl Med*. 2024 April ;12(2):29. [doi:10.21037/atm-23-1815](https://doi.org/10.21037/atm-23-1815)
12. Goeschen K, Gold D, Liedl B, Yassouridis A, Petros PE. Non-Hunner's interstitial cystitis (IC) is different from Hunner's IC and may be curable by uterosacral ligament repair. *Urol Int*. 2022 July;106(7):649-657. [doi:10.1159/000524321](https://doi.org/10.1159/000524321)
13. Liedl B, Inoue H, Sekiguchi Y, Haverfield M, Ruchardson P, Yassourides A, Wagenlehner F. Is overactive bladder in the female surgically curable by ligament repair? *Cent European J Urol*. 2017;70(1):51-57. [doi:10.5173/cej.2017.938](https://doi.org/10.5173/cej.2017.938)
14. Liedl B, Goeschen K, Grigoryan N, Sutherland S, Yassouridis A, Witczak M, Roovers JP. The association between pelvic organ prolapse, pelvic pain and pelvic reconstructive surgery using transvaginal mesh: A secondary analysis of a prospective multicenter observational cohort trial. *J Clin Gynecol Obstet*. 2020;9(4):79-95. [doi:10.14740/jcgo696](https://doi.org/10.14740/jcgo696)

15. Inoue H, Kohata Y, Fukuda T, Monma M, Uzawa Y, Kubo Y, Watanabe R, Kusaka T,. Repair of damaged ligaments with tissue fixation system minisling is sufficient to cure major prolapse in all three compartments: 5-year data. *J Obstet Gynaecol Res.* 2017;43:1570-7. doi:[10.1111/jog.13413](https://doi.org/10.1111/jog.13413)
16. Inoue H, Nakamura R, Sekiguchi Y, Kohata Y, Fukuda T, Oonuma K, Uzawa Y, Watanabe R. Tissue Fixation System ligament repair cures major pelvic organ prolapse in ageing women with minimal complications - a 10-year Japanese experience in 960 women. *Cent European J Urol.* 2021;74(4):552-562.  
doi: 10.5173/ceju.2021.0208
17. Petros PEP, Richardson PA. TFS posterior sling improves overactive bladder, pelvic pain and abnormal emptying, even with minor prolapse –a prospective urodynamic study. *Pelvipерineology.* 2010;29:52-55.
18. Petros P, Bornstein J. Re: vulvar vestibulitis may be a referred pain arising from laxity in the uterosacral ligaments: a hypothesis based on three prospective case reports. *Aust N Z J Obstet Gynaecol.* 2004 Oct;44(5):484-5. doi: 10.1111/j.1479-828X.2004.00297.x
19. Himmeler M, Göttl K, Witczak M, Yassouridis A, Gold DM, Liedl B. The impact of transvaginal, mesh-augmented level one apical repair on anorectal dysfunction due to pelvic organ prolapse. *Int Urogynecol J.* 2022 Nov;33(11):3261-3273. doi: 10.1007/s00192-022-05151-3
20. Himmeler M, Rakhimbayeva A, Sutherland SE, Roovers JP, Yassouridis A, Liedl B. The impact of sacrospinous ligament fixation on pre-existing nocturia and co-existing pelvic floor dysfunction symptoms. *Int Urogynecol J.* 2021 Apr;32(4):919-928. doi: 10.1007/s00192-020-04440-z
21. Himmeler M, Kohl M, Rakhimbayeva A, Witczak M, Yassouridis A, Liedl B. Symptoms of voiding dysfunction and other coexisting pelvic floor dysfunctions: the impact of transvaginal, mesh-augmented sacrospinous ligament fixation. *Int Urogynecol J.* 2021 Oct;32(10):2777-2786. doi: 10.1007/s00192-020-04649-y
22. Bornstein J, Zarfati, D, Petros PEP. Causation of vulvar vestibulitis. *Aust N Z J Obstet Gynaecol.* 2005;45:538–541.
23. Petros P. Interstitial cystitis (painful bladder syndrome) may, in some cases, be a referred pain from the uterosacral ligaments. *Pelvipерineology.* 2010; 9:56-9.
24. Petros P, Quaghebeur J, Wyndaele JJ. Defining urge as an uncontrolled micturition explains pathogenesis, informs cure and helps solve the burgeoning OAB crisis. *Neurourol Urodyn.* 2022;41:1281-92.
25. Tanagho EA. The anatomy and physiology of micturition. *Clin Obstet Gynaecol.* 1978;5:1:3-25.
26. Skilling PM. Can interstitial cystitis be improved by the Integral Theory's squatting-based pelvic floor exercises used for SUI, urge, nocturia, and emptying symptoms? *Pelvipерineology.* 2021;40(4):194-202. doi:10.34057/PPj.2021.40.04.2021-7-7
27. Wagenlehner, F.M.E., Fröhlich, O., Bschleipfer, T. et al. The Integral Theory System Questionnaire: an anatomically directed questionnaire to determine pelvic floor dysfunctions in women. *World J Urol.* 2014;32:769–781. <https://doi.org/10.1007/s00345-013-1150-z>
28. Petros PE Chapter 7 in textbook *Current and emerging issues, The female pelvic floor, function, dysfunction and management according to the Integral Theory.* Petros PE, 1<sup>st</sup> edition. Springer Heidelberg. 2004. p 179.
29. Schonfeld M, Petros P, Bornstein J. Mechanically supporting Uterosacral Ligaments for the relief of Provoked Vulvodynia: A randomized pilot trial. *J Pain Res.* 2021 May;14:1288. doi:10.2147/JPR.S296613

30. Sivaslioglu AA, Sun X, Hodgson R, Riccetto C. Wide-bore polyester sutures may create sufficient collagen for cure of prolapse/incontinence: A work in progress. *Ann Transl Med.* 2024 Apr 22;12(2):36. doi:10.21037/atm-23-1774
31. Petros PE, Papadimitriou J, Bornstein J. A hypothesis for anatomical pathways of chronic pelvic pain “of unknown origin”. *Urol Int.* 2024 (in press)

## FIGURES AND LEGENDS

### Figure 1 “simulated operation” relieves pain and urge by supporting USL.

*Left:* 3D view of the PUL and USL attachments to the pelvic brim. “L”, USL laxity. A gently inserted speculum mechanically supports lax USLs and pelvic visceral nerve plexuses “VP”. The test, if successful, decreases afferent pain and urge impulses; the patient reports lessening pain in multiple sites, for example, “B”, “R”, and “M” (right image). Co-occurring urge is also often relieved by speculum support of urothelial stretch receptors “N”.

*Right:* 3D view of pelvic organs. The VP comprises sympathetic plexus “SP” and parasympathetic plexus “PS”. The yellow lines represent visceral nerves to and from the end organs. M (muscles) V (vagina/vulva), B (bladder), R (rectum). “G” force of gravity acting on “VPs”. (left figure) PCM, pubococcygeus muscle; PUL, pubourethral ligament; AFTP, arcus tendineus fascia pelvis; USL, uterosacral ligament; CL, cardinal ligament; LP, levator plate; LMA, conjoint longitudinal muscle of the anus.

**Figure 2 Binary model for bladder control by 2 opposing reflexes, EITHER closure OR micturition.** Schematic 3D sagittal view, System in normal closed mode. PCM= pubococcygeus muscle; LP = levator plate; LMA = conjoint longitudinal muscle of the anus; PUL= pubourethral ligaments; USL = uterosacral ligaments; N = urothelial stretch receptors; CX = cervix; CL = cardinal ligament; AFTP = arcus tendineus fascia pelvis; small green arrows = afferent and efferent nerves’ white arrows = cortical suppression. *Control of SUI.* PCM closes the distal urethra from behind; LP/LMA stretches the proximal urethra around PUL to close the bladder neck.

*Control of urge* Afferent impulses ‘X’ from stretch receptors ‘N’ signal bladder fullness reflexly suppressed cortically (white arrows). or peripherally by a musculo-elastic mechanism, vaginal stretching by 3 striated pelvic muscles contracting against PUL and USL. *Micturition:* The closure reflex is shut down and the micturition reflex is activated. PCM relaxes. LP and LMA open out the posterior wall of the urethra (white broken lines below the urethra).

*Dysfunction:* Any lesion in the circuit can cause retention or loss of urge control: cortex; collagen loss in PUL, USL weakens pelvic muscle contractile strength; excitation of “N by inflammation, tumour; MS in afferent nerves (retention), MS in efferent nerves leakage.

### Figure 3 How ligament laxity diminishes striated muscle force

#### A. anatomy

If USLs are overstretched by length “E”, the uterus prolapses, LP and LMA lengthen by “E”. The wavy shape of LP and LMA indicate diminution of contractile strength.

#### B. sarcomere (striated muscle fibres)

A striated muscle contracts optimally of a short length only (“L”).

Elongation of the muscle to “E” diminishes contractile force.

USL=uterosacral ligaments; LP=levator plate; LMA= conjoint longitudinal muscle of the anus

**Figure 4 The anatomy of nocturia Pelvic muscles (large arrows) are relaxed.** As the bladder (broken outline) fills, it is distended downwards by gravity “G”. If the uterosacral ligaments “USL” are weak, they continue to descend until the stretch receptors “N” are stimulated, activating the micturition reflex once the cortical closure reflex “C” has been overcome. O, opening; PCM, pubococcygeus muscle; LP, levator plate; LMA, conjoint longitudinal muscle of the anus.

**Figure 5 The pictorial diagnostic algorithm.** Symptoms indicate which ligaments are damaged. Tick every box where a symptom occurs, and the diagnosis of ligament and damage-associated prolapse appears.

The rectangle indicates the symptoms associated with USL laxity. The height of the bar indicates the probability of association of a symptom with a particular zone. The connective tissue structures causing prolapse and pelvic symptoms fall naturally into 3 zones. Anterior zone: external meatus to bladder neck. Middle zone: bladder neck to anterior cervical ring. Posterior zone: posterior cervical ring to PB. Chronic pelvic pain and nocturia are uniquely caused by USL laxity. PUL, pubourethral ligament; hammock, suburethral vagina; EUL, external urethral ligament; CL, cardinal ligament; PCF, pubocervical fascia; ATRF, arcus tendinous fascia pelvis; PB, perineal body; USLs, uterosacral ligaments; RVF, rectovaginal fascia; USL, uterosacral ligament.

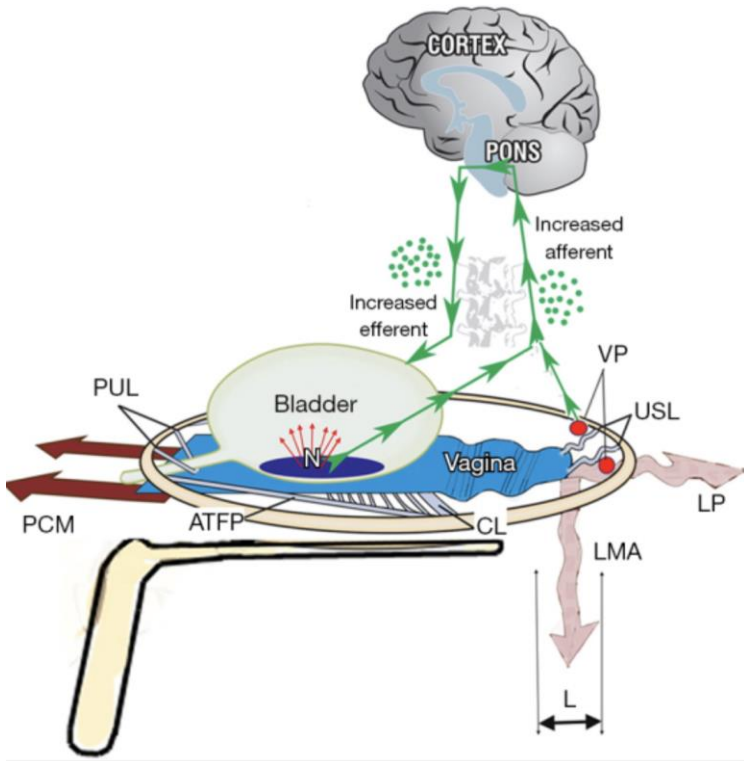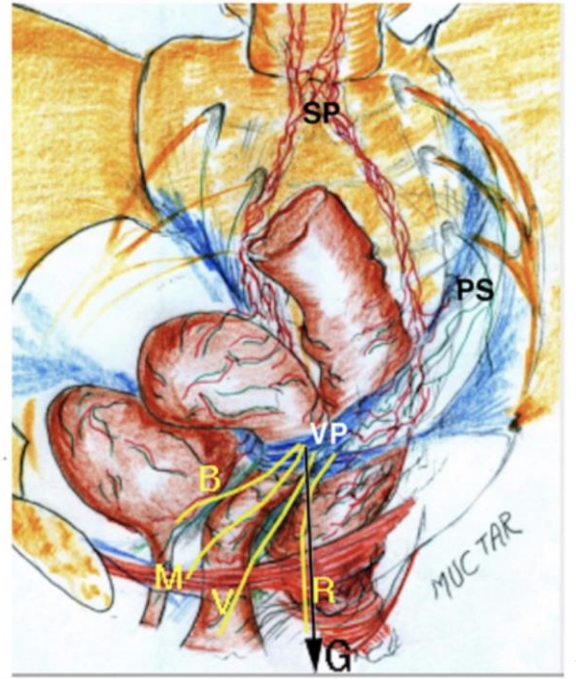

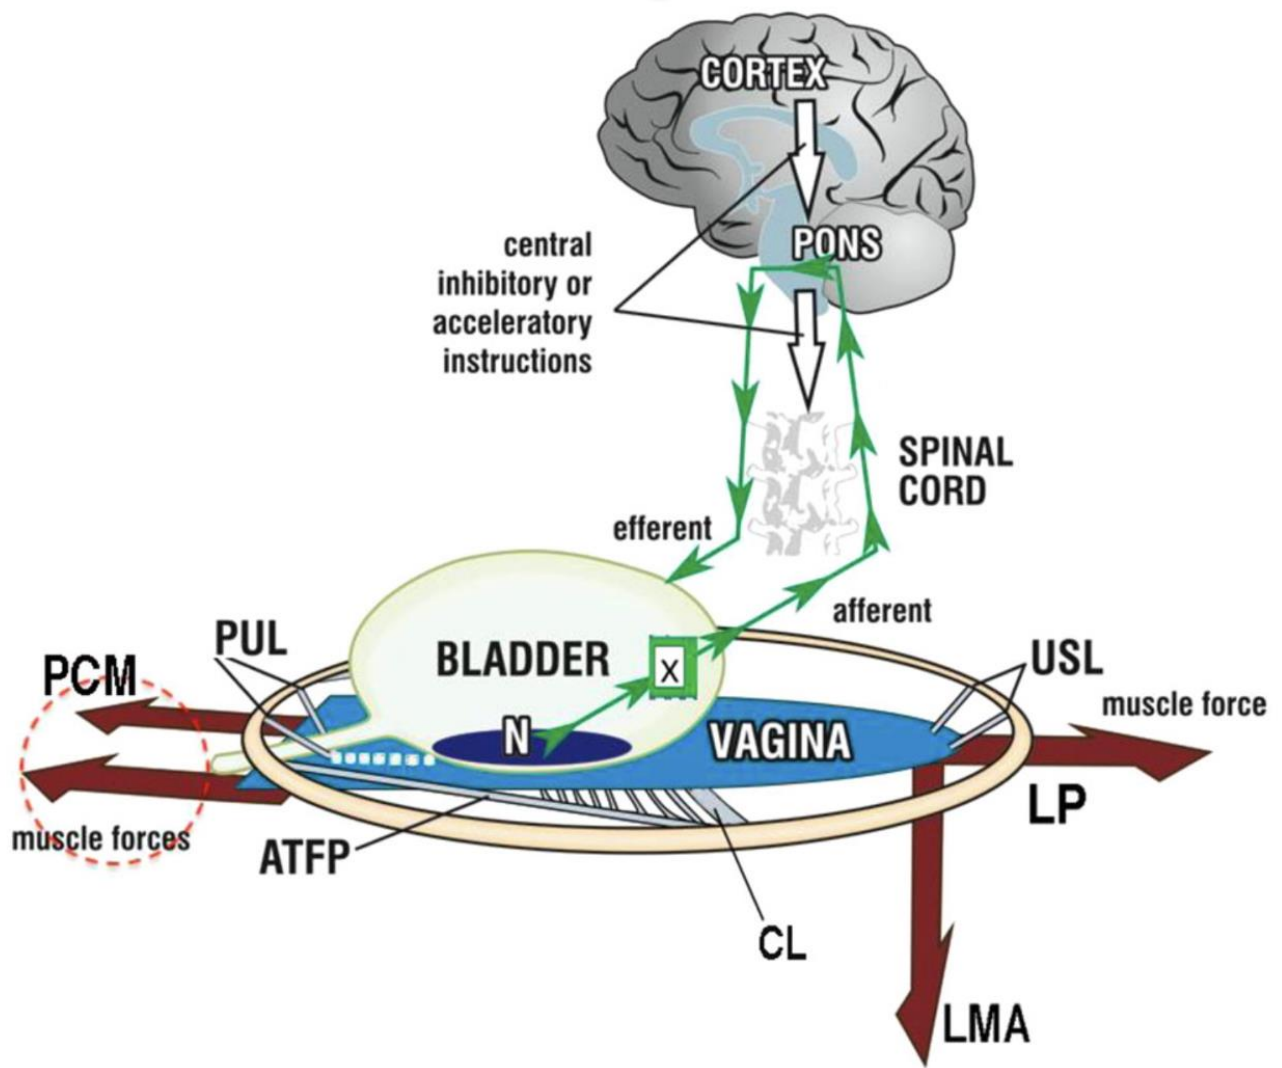



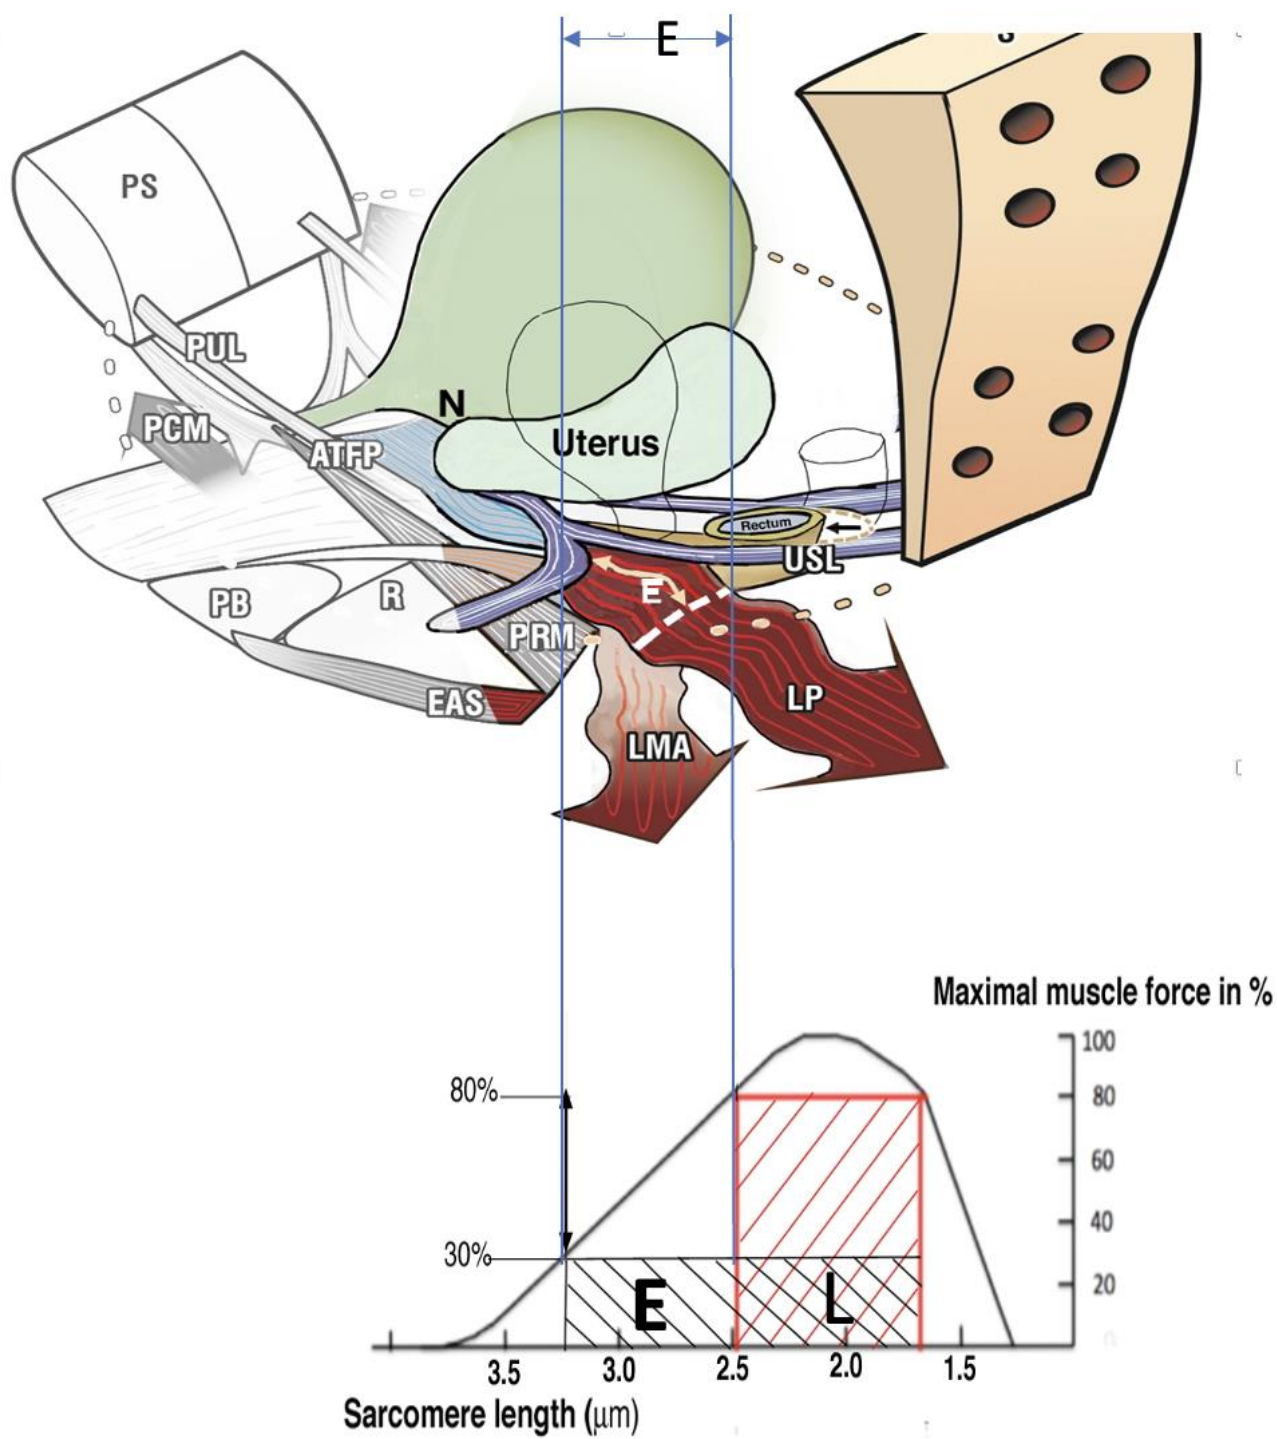

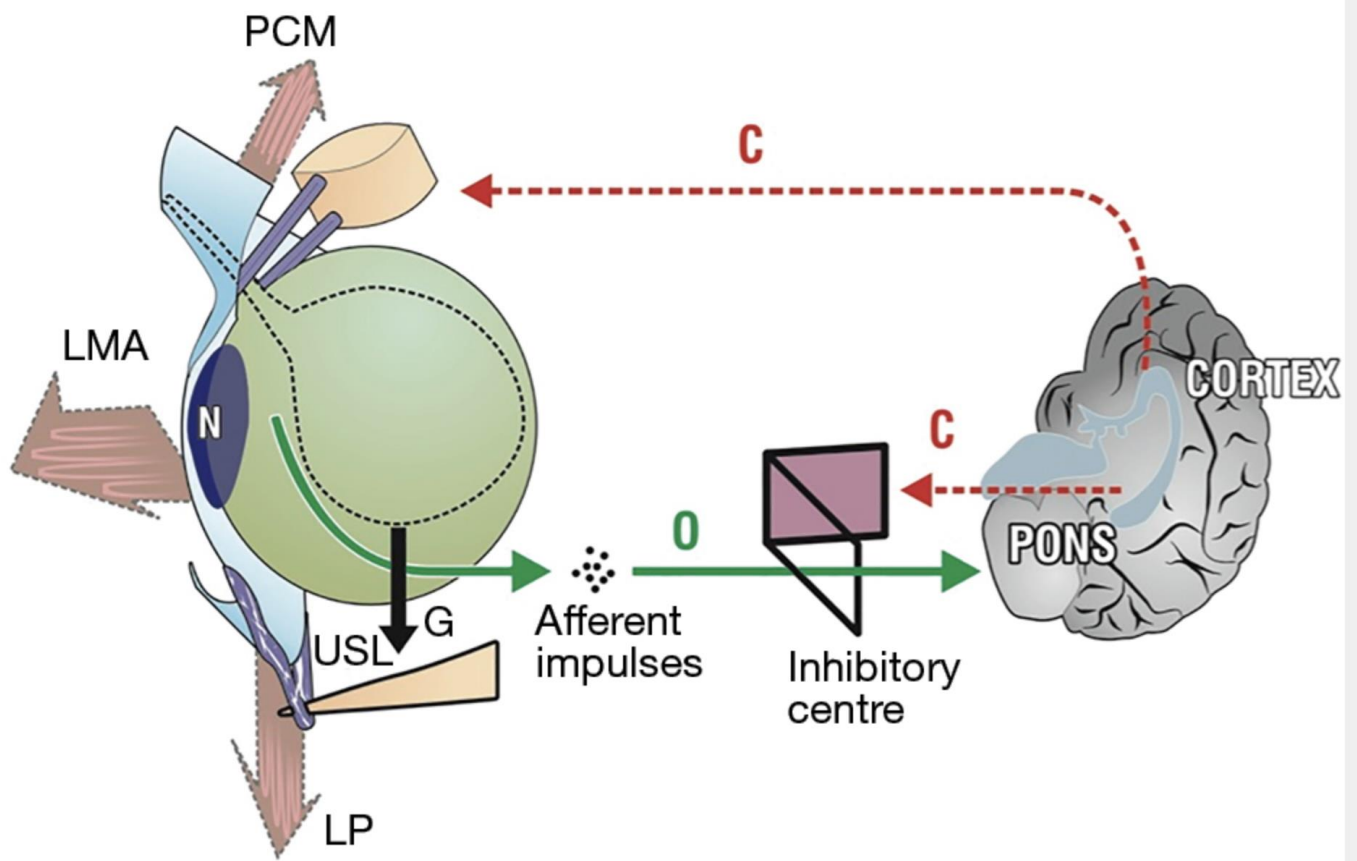

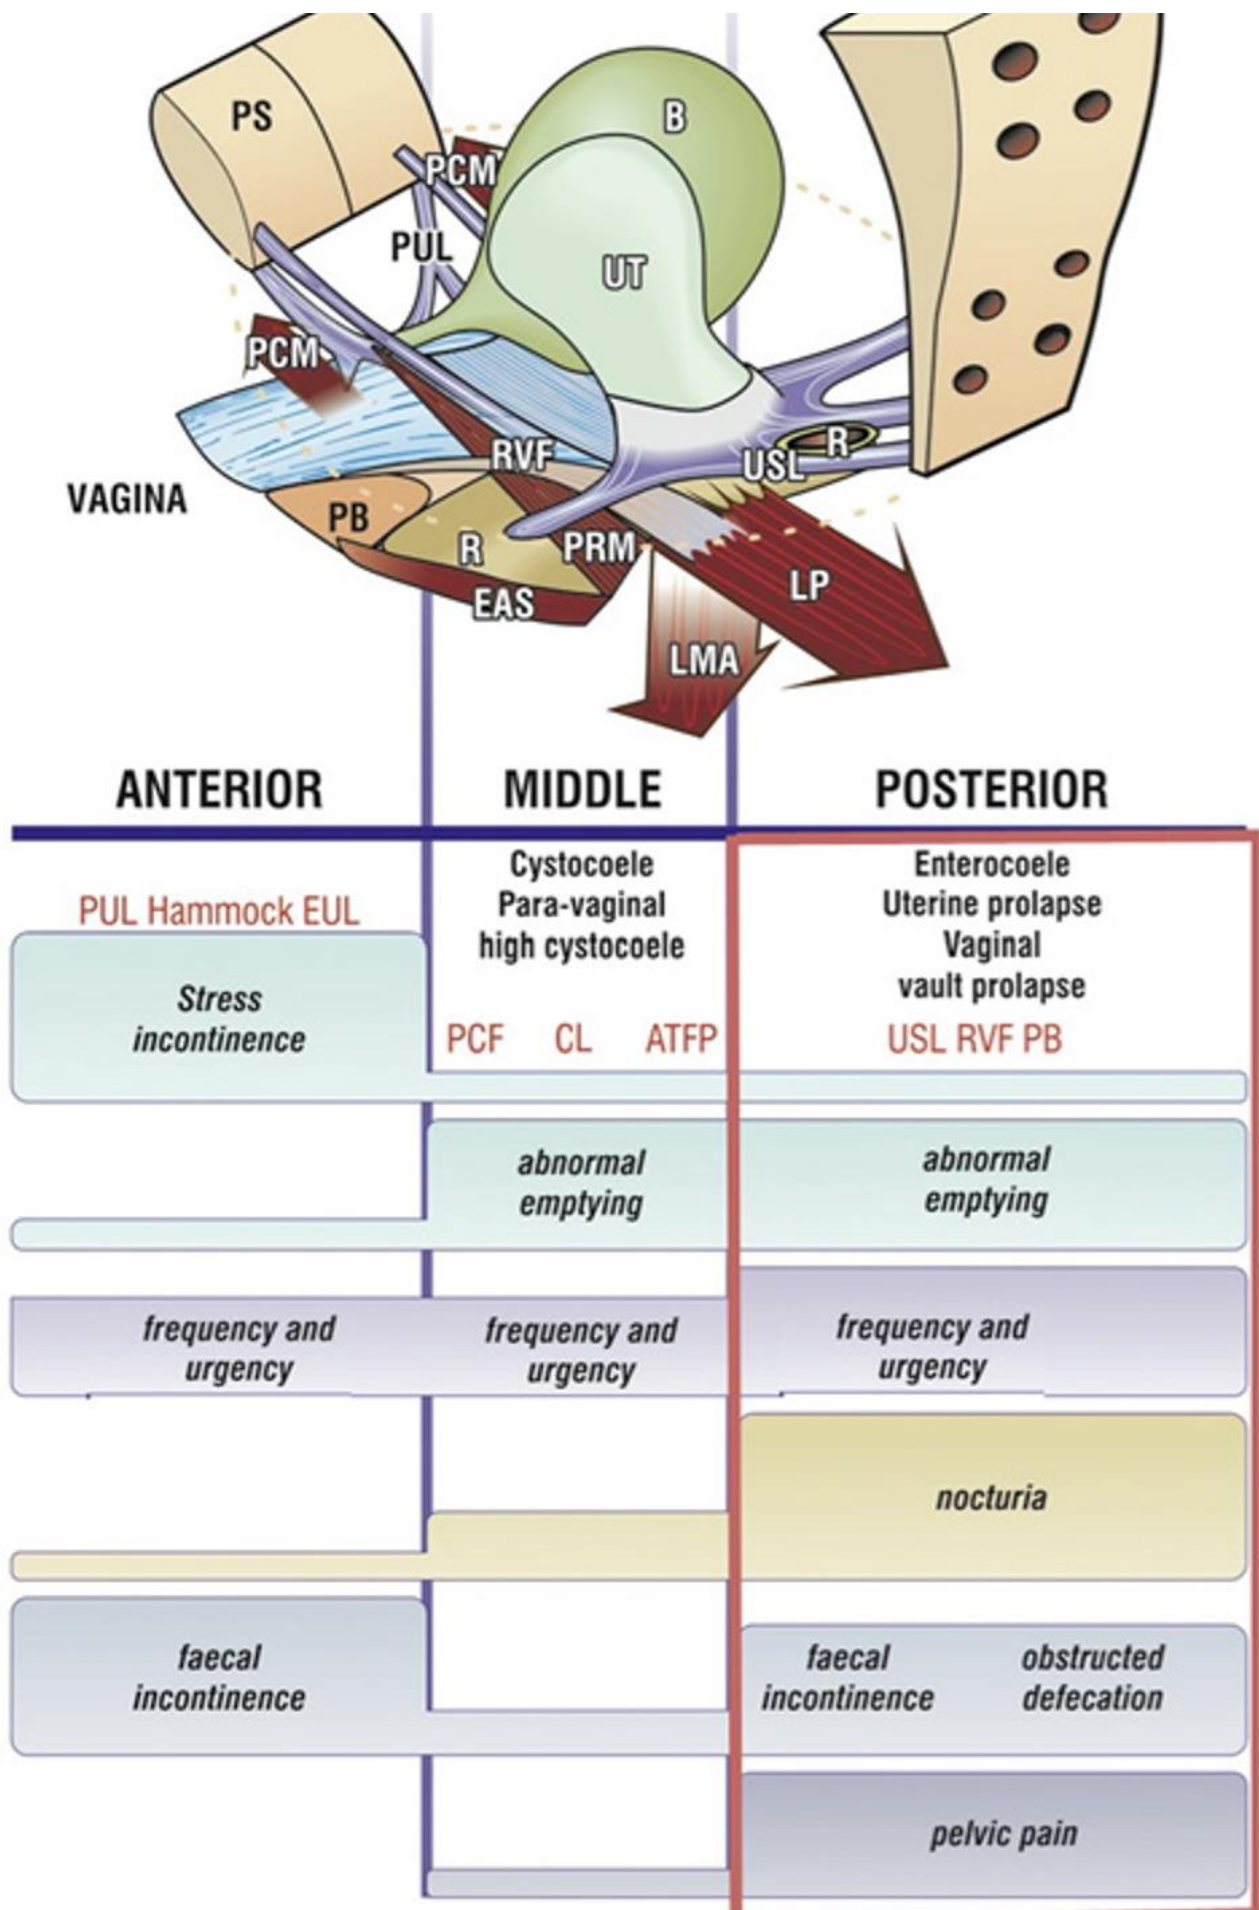

Source: https://karger.silverchair-cdn.com/uin/article-pdf/doi/10.1159/000547785/4413547/000547785.pdf
